# Supplementary material
Source: Springer Nature journal article supplement (https://www.springermedizin.de/resource/supplementary/12889_2011_2925_MOESM1_ESM.PDF/9487686)
Supplement: MOESM1 [file 9487686]

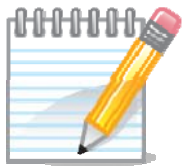

Institute Name and Contact Information

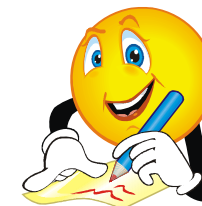

## KIDS-METER LOG

At the next table, you see an example of how to fill in the diary for the kids meter. Write down the dates and days on which you wear the kids-meter. Note the times that you put it on and take it off during each day for getting up in the morning and going to bed for sleeping. If you put it off for more than 5 minutes please write this down below and for what reason (e.g. swimming, etc.)

### Sample Entry

|             |                             |          |
|-------------|-----------------------------|----------|
| Day         | Tuesday                     |          |
| Date        | March 1, 2010               |          |
| School Day  | Yes (x) No ( ) Half-day ( ) |          |
|             | Get up                      | Sleeping |
| Time        | 7.30                        | 21.00    |
| Activity    | Start time                  | End time |
| 1. Swimming | 10.00                       | 10.40    |
| 2.          |                             |          |

**DON'T FORGET TO FILL THIS TABLE IN DURING THE NEXT 6 DAYS**

|            |                             |                             |                             |                             |                             |                             |                             |                             |                             |                             |                             |                             |
|------------|-----------------------------|-----------------------------|-----------------------------|-----------------------------|-----------------------------|-----------------------------|-----------------------------|-----------------------------|-----------------------------|-----------------------------|-----------------------------|-----------------------------|
| Day        |                             |                             |                             |                             |                             |                             |                             |                             |                             |                             |                             |                             |
| Date       |                             |                             |                             |                             |                             |                             |                             |                             |                             |                             |                             |                             |
| School Day | Yes ( ) No ( ) Half-day ( ) | Yes ( ) No ( ) Half-day ( ) | Yes ( ) No ( ) Half-day ( ) | Yes ( ) No ( ) Half-day ( ) | Yes ( ) No ( ) Half-day ( ) | Yes ( ) No ( ) Half-day ( ) | Yes ( ) No ( ) Half-day ( ) | Yes ( ) No ( ) Half-day ( ) | Yes ( ) No ( ) Half-day ( ) | Yes ( ) No ( ) Half-day ( ) | Yes ( ) No ( ) Half-day ( ) | Yes ( ) No ( ) Half-day ( ) |
|            | Get up                      | Sleeping                    | Get up                      | Sleeping                    | Get up                      | Sleeping                    | Get up                      | Sleeping                    | Get up                      | Sleeping                    | Get up                      | Sleeping                    |
| Time       |                             |                             |                             |                             |                             |                             |                             |                             |                             |                             |                             |                             |
| Activity   | Start time                  | End time                    | Start time                  | End time                    | Start time                  | End time                    | Start time                  | End time                    | Start time                  | End time                    | Start time                  | End time                    |
| 1.         |                             |                             |                             |                             |                             |                             |                             |                             |                             |                             |                             |                             |
| 2.         |                             |                             |                             |                             |                             |                             |                             |                             |                             |                             |                             |                             |
| 3.         |                             |                             |                             |                             |                             |                             |                             |                             |                             |                             |                             |                             |

### RESEARCHER WILL FILL IN THIS PART

Country Code:

School Code:

Class Code:

Date of Birth (Age):

Student Code:

Serial number:

Date of distributing:

Date of collecting back:
